# Supplementary material for: Messung der gesundheitsbezogenen Lebensqualität 8- bis 11-jähriger psychisch kranker Kinder im Rahmen von Qualitätssicherungsmaßnahmen
Source: Atypon-hosted journal article supplement (doi:10.1026/0012-1924/a000283), 2022-02-08
Supplement: 0012-1924_a000283_esm3.pdf [file 0012-1924_a000283_esm3.pdf]

Tabelle E1. Part-whole korrigierte Itemtrennschärfen für die a priori sechs Faktorenstruktur der Kid-KINDL **Selbsteinschätzungsversion** unter listenweisem Fallausschluss ( $N = 368$ )

| Item                                    | Gesamtwert | Itemtrennschärfen |        |            |         |         |        |
|-----------------------------------------|------------|-------------------|--------|------------|---------|---------|--------|
|                                         |            | Körper            | Psyche | Selbstwert | Familie | Freunde | Schule |
| 1 krank gefühlt (Kör1)<br>Kopf /        | .35        | .45               |        |            |         |         |        |
| 2 Bauchschmerzen<br>(Kör2)              | .38        | .41               |        |            |         |         |        |
| 3 müde / schlapp<br>(Kör3)              | .41        | .50               |        |            |         |         |        |
| 4 Kraft / Ausdauer<br>(Kör4)            | .47        | .40               |        |            |         |         |        |
| 5 Freude / viel gelacht<br>(Psy1)       | .56        |                   | .48    |            |         |         |        |
| 6 Keine Lust (Psy2)                     | .40        |                   | .41    |            |         |         |        |
| 7 allein gefühlt (Psy3)                 | .62        |                   | .53    |            |         |         |        |
| 8 ängstlich / unsicher<br>(Psy4)        | .47        |                   | .39    |            |         |         |        |
| 9 stolz fühlen (Sel1)                   | .46        |                   |        | .62        |         |         |        |
| 10 Wohlbefinden (Sel2)                  | .52        |                   |        | .67        |         |         |        |
| 11 Selbst mögen (Sel3)                  | .41        |                   |        | .41        |         |         |        |
| 12 gute Ideen gehabt<br>(Sel4)          | .39        |                   |        | .47        |         |         |        |
| 13 Mit Eltern verstanden<br>(Fam1)      | .34        |                   |        |            | .55     |         |        |
| 14 zu Hause wohlgefühlt<br>(Fam2)       | .30        |                   |        |            | .64     |         |        |
| 15 Streit mit Eltern<br>(Fam3)          | .26        |                   |        |            | .61     |         |        |
| 16 Bevormundung durch<br>Eltern (Fam4)  | .19        |                   |        |            | .39     |         |        |
| 17 Mit Freunden gespielt<br>(Fre1)      | .43        |                   |        |            |         | .51     |        |
| 18 Bei anderen gut<br>angekommen (Fre2) | .53        |                   |        |            |         | .30     |        |
| 19 Mit Freunden<br>verstanden (Fre3)    | .47        |                   |        |            |         | .39     |        |
| 20 Anders gefühlt (Fre4)                | .44        |                   |        |            |         | .35     |        |
| 21 Schule gut geschafft<br>(Sch1)       | .39        |                   |        |            |         |         | .40    |
| 22 Spaß am Unterricht<br>(Sch2)         | .43        |                   |        |            |         |         | .33    |
| 23 Sorge um Zukunft<br>(Sch3)           | .43        |                   |        |            |         |         | .40    |
| 24 Angst um Noten<br>(Sch4)             | .28        |                   |        |            |         |         | .36    |

Tabelle E2. Part-whole korrigierte Itemtrennschärfen für die a priori sechs Faktorenstruktur der Kid-KINDL **Fremdeinschätzungsversion** unter listenweisem Fallausschluss ( $N = 367$ )

| Item                                    | Gesamtwert | Itemtrennschärfen |        |            |         |         |        |
|-----------------------------------------|------------|-------------------|--------|------------|---------|---------|--------|
|                                         |            | Körper            | Psyche | Selbstwert | Familie | Freunde | Schule |
| 1 krank gefühlt (Kör1)<br>Kopf /        | .46        | .60               |        |            |         |         |        |
| 2 Bauchschmerzen<br>(Kör2)              | .38        | .48               |        |            |         |         |        |
| 3 müde / schlapp<br>(Kör3)              | .47        | .52               |        |            |         |         |        |
| 4 Kraft / Ausdauer<br>(Kör4)            | .44        | .40               |        |            |         |         |        |
| 5 Freude / viel gelacht<br>(Psy1)       | .64        |                   | .54    |            |         |         |        |
| 6 Keine Lust (Psy2)                     | .61        |                   | .56    |            |         |         |        |
| 7 allein gefühlt (Psy3)                 | .60        |                   | .56    |            |         |         |        |
| 8 ängstlich / unsicher<br>(Psy4)        | .60        |                   | .59    |            |         |         |        |
| 9 stolz fühlen (Sel1)                   | .57        |                   |        | .55        |         |         |        |
| 10 Wohlbefinden (Sel2)                  | .68        |                   |        | .63        |         |         |        |
| 11 Selbst mögen (Sel3)                  | .59        |                   |        | .59        |         |         |        |
| 12 gute Ideen gehabt<br>(Sel4)          | .40        |                   |        | .39        |         |         |        |
| 13 Mit Eltern verstanden<br>(Fam1)      | .40        |                   |        |            | .67     |         |        |
| 14 zu Hause wohlgeföhlt<br>(Fam2)       | .35        |                   |        |            | .45     |         |        |
| 15 Streit mit Eltern<br>(Fam3)          | .35        |                   |        |            | .61     |         |        |
| 16 Bevormundung durch<br>Eltern (Fam4)  | .36        |                   |        |            | .50     |         |        |
| 17 Mit Freunden gespielt<br>(Fre1)      | .57        |                   |        |            |         | .62     |        |
| 18 Bei anderen gut<br>angekommen (Fre2) | .56        |                   |        |            |         | .76     |        |
| 19 Mit Freunden<br>verstanden (Fre3)    | .50        |                   |        |            |         | .68     |        |
| 20 Anders geföhlt (Fre4)                | .56        |                   |        |            |         | .48     |        |
| 21 Schule gut geschafft<br>(Sch1)       | .45        |                   |        |            |         |         | .39    |
| 22 Spaß am Unterricht<br>(Sch2)         | .50        |                   |        |            |         |         | .43    |
| 23 Sorge um Zukunft<br>(Sch3)           | .41        |                   |        |            |         |         | .30    |
| 24 Angst um Noten<br>(Sch4)             | .26        |                   |        |            |         |         | .31    |

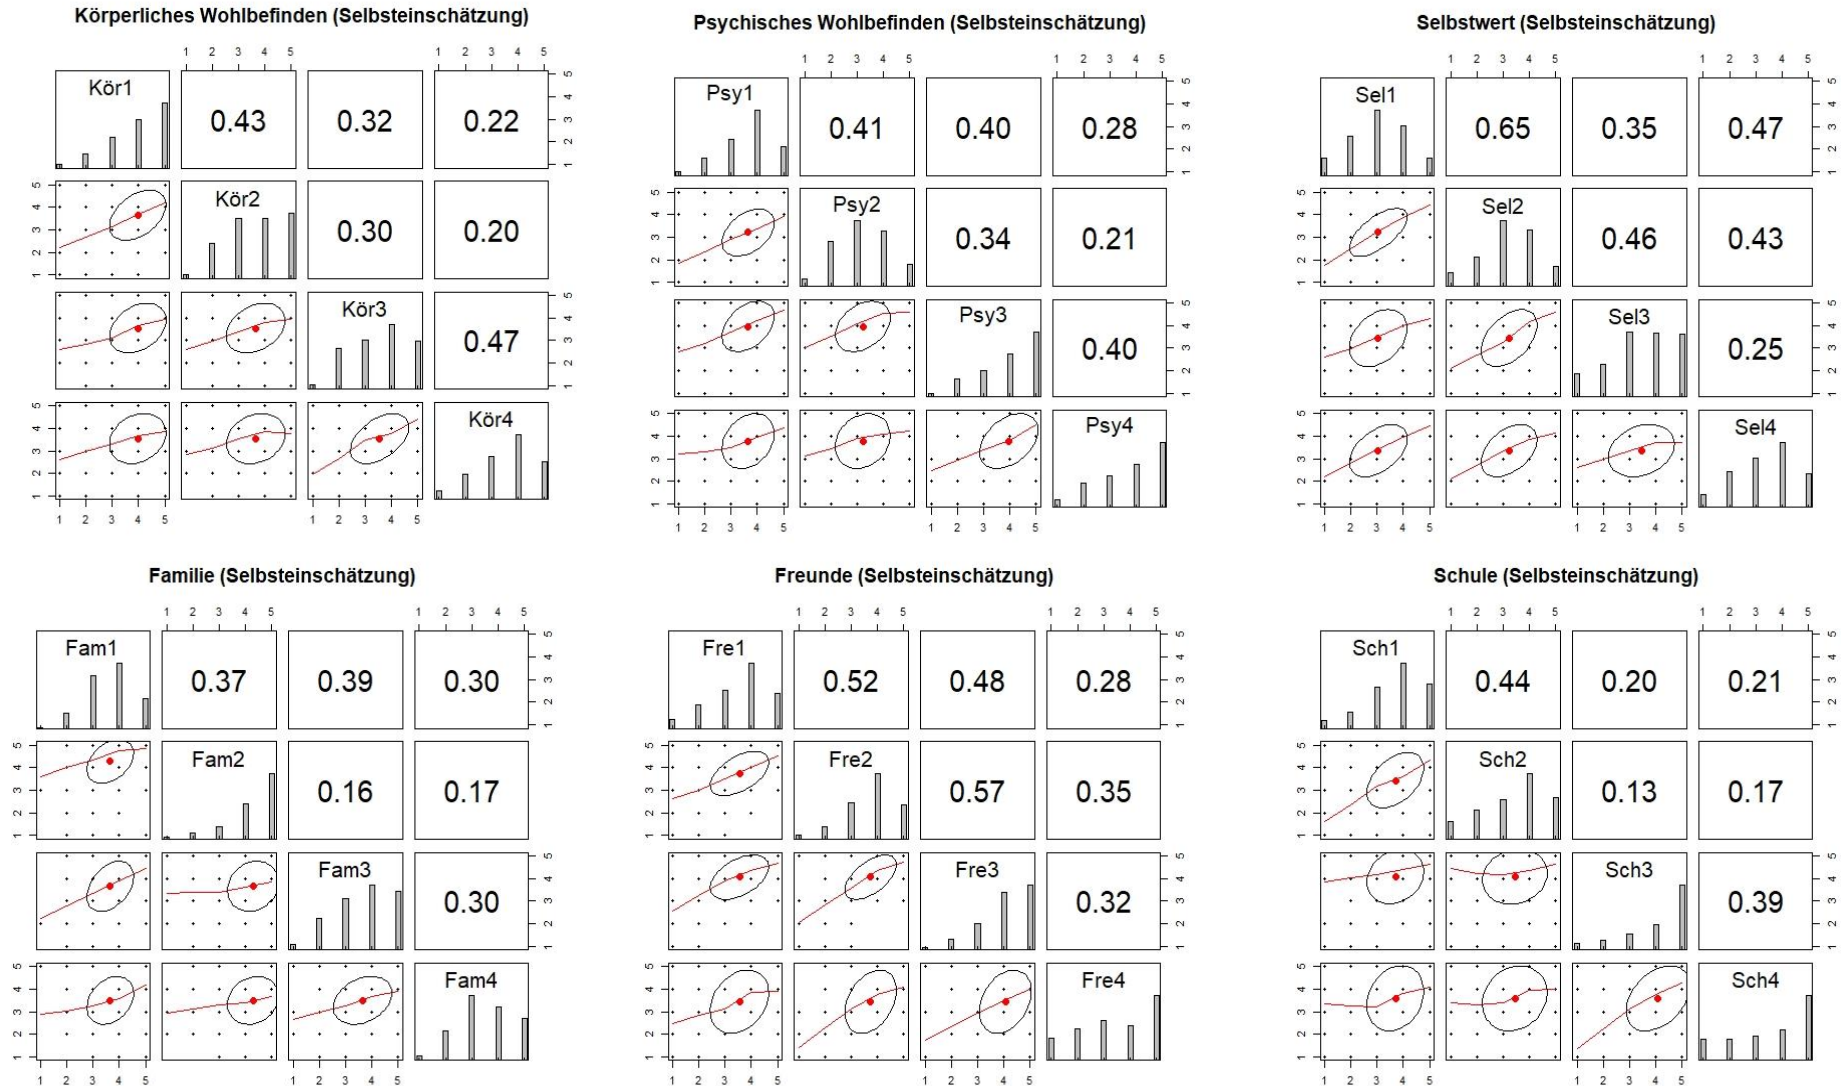

Anmerkungen. In der Diagonalen sind die relativen Antworthäufigkeiten der Items abgebildet. Oberhalb der Diagonalen sind die Iteminterkorrelationen (Spearman Rang-Korrelation) abgetragen. Die untere Triangel zeigt eine Regressionsgerade (Lokale polynomiale Regression, loess-Regression). Die Ellipse bildet die Iteminterkorrelation zweier Items grafisch ab.

Abbildung E1. Antworthäufigkeiten und Iteminterkorrelationen der Skalen des a priori postulierten sechsfaktoriellen Kid-KINDL Modells in der Selbsteinschätzung

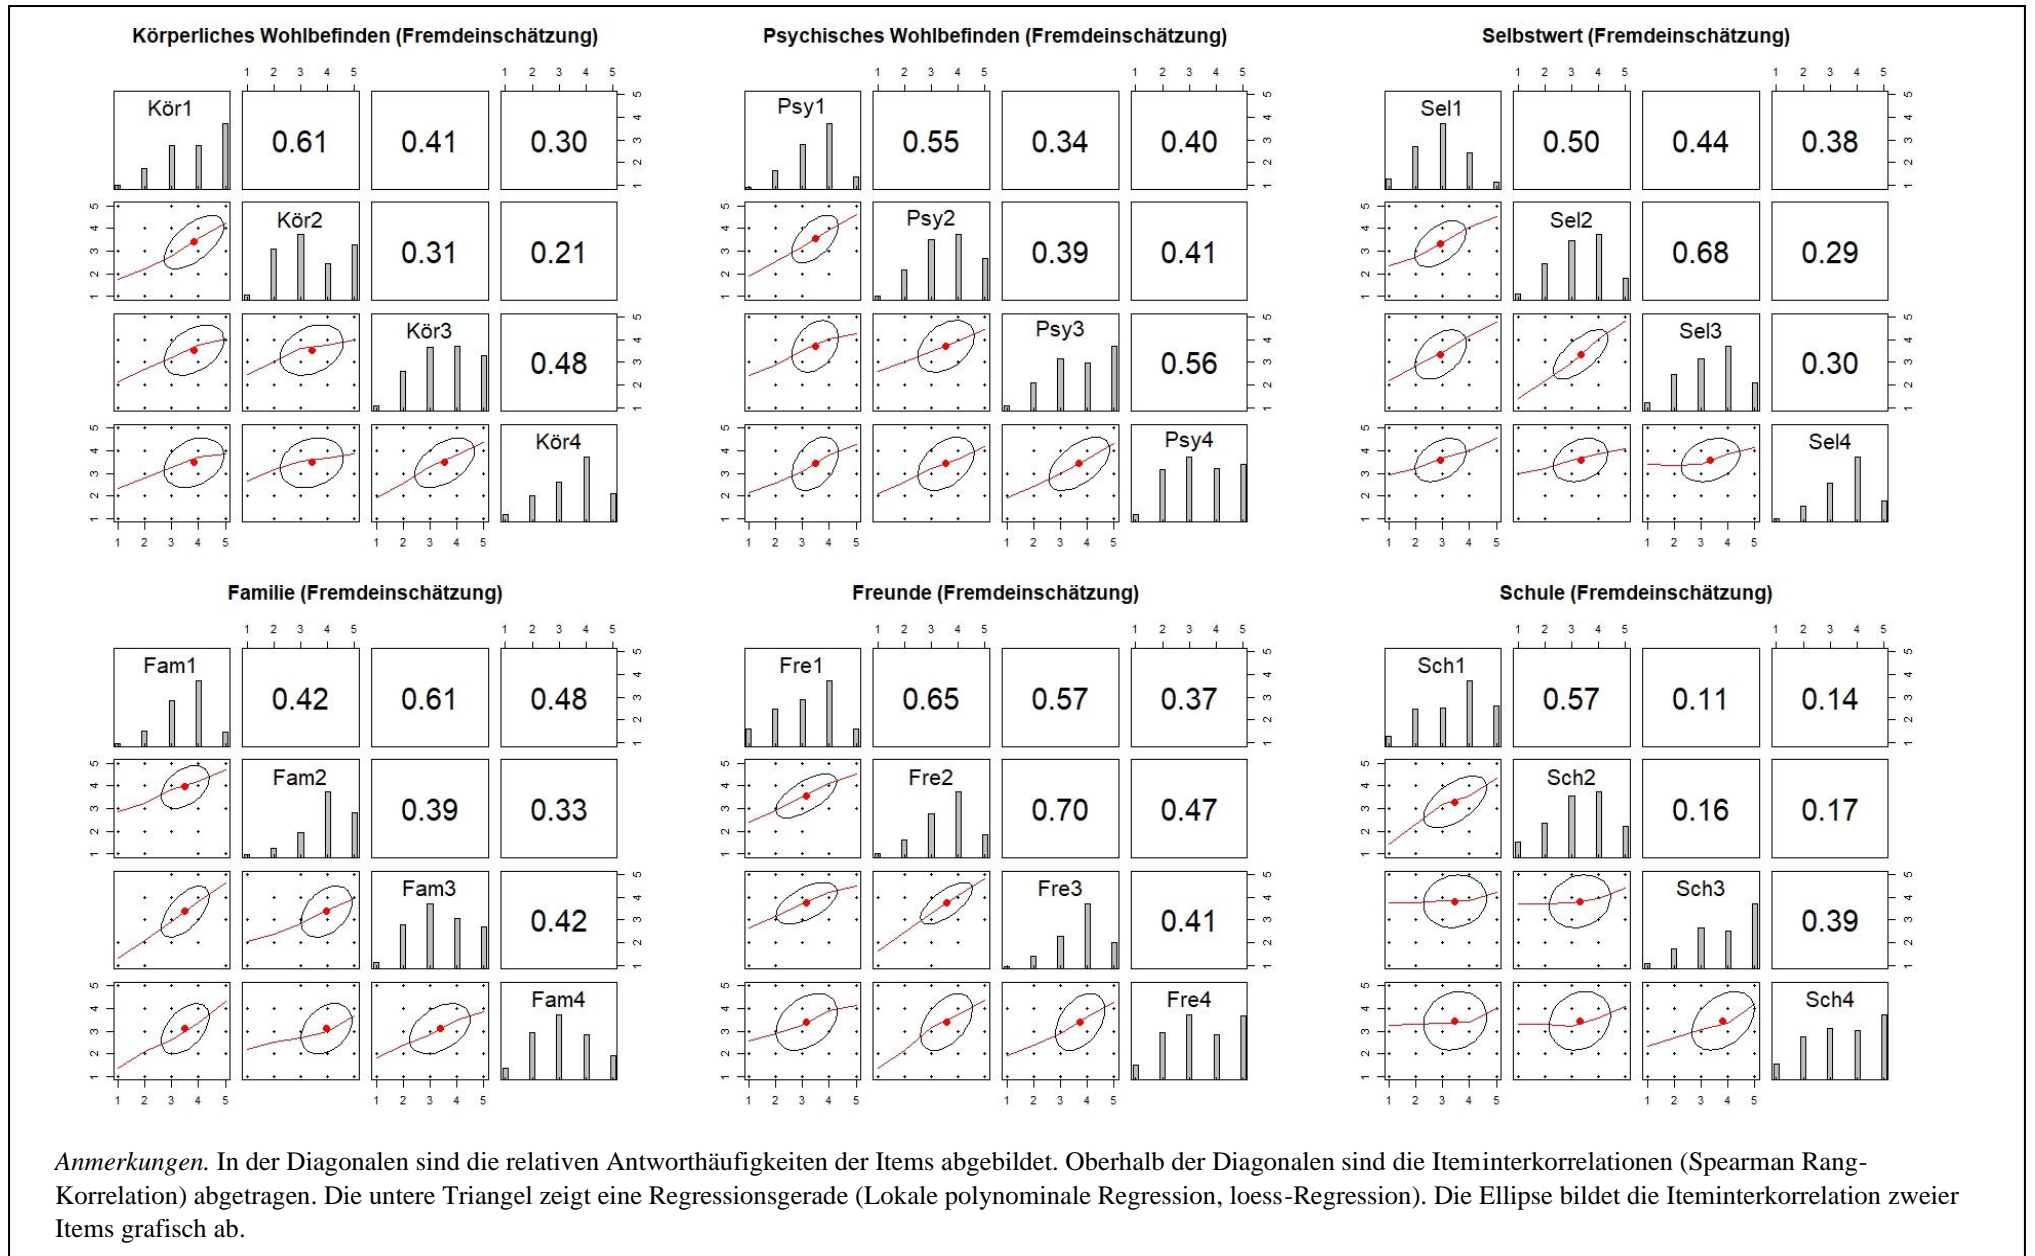

Abbildung E2. Antworthäufigkeiten und Iteminterkorrelationen der Skalen des a priori postulierten sechsfaktoriellen Kid-KINDL Modells in der Fremdeinschätzung
