# Supplementary material for: Messung der gesundheitsbezogenen Lebensqualität 8- bis 11-jähriger psychisch kranker Kinder im Rahmen von Qualitätssicherungsmaßnahmen
Source: Atypon-hosted journal article supplement (doi:10.1026/0012-1924/a000283), 2022-02-08
Supplement: 0012-1924_a000283_esm4.pdf [file 0012-1924_a000283_esm4.pdf]

*Elektronisches Supplement 4. Varianzaufklärung, Faktorladungen und Faktorinterkorrelationen der durchgeführten Promax-rotierten Hauptachsenanalysen*

*Tabelle E1. Faktorielle Struktur der Kid-KINDL Selbsteinschätzung nach Durchführung einer Hauptachsenanalyse (N = 147, dargestellt wurden alle Faktorladungen  $\geq .30$  der Promax-rotierten Sechsfaktoren-Lösung mit MinRes Schätzverfahren)*

|                               | Item                                          | Faktorladungen |          |          |          |          |          | $h^2$ |  |  |  |  |  |
|-------------------------------|-----------------------------------------------|----------------|----------|----------|----------|----------|----------|-------|--|--|--|--|--|
|                               |                                               | Faktor 1       | Faktor 2 | Faktor 3 | Faktor 4 | Faktor 5 | Faktor 6 |       |  |  |  |  |  |
| 10                            | Wohlbefinden (Sel2)                           |                | .90      |          |          |          |          | .73   |  |  |  |  |  |
| 9                             | stolz fühlen (Sel1)                           |                | .75      |          |          |          |          | .60   |  |  |  |  |  |
| 12                            | gute Ideen gehabt (Sel4)                      |                | .61      |          |          |          |          | .40   |  |  |  |  |  |
| 11                            | Selbst mögen (Sel3)                           |                | .60      |          |          |          |          | .47   |  |  |  |  |  |
| 4                             | Kraft / Ausdauer (Kör4) <sup>b</sup>          |                | .31      |          |          |          |          | .32   |  |  |  |  |  |
| 19                            | Mit Freunden verstanden (Fre3)                |                |          |          | .91      |          |          | .66   |  |  |  |  |  |
| 18                            | Bei anderen gut angekommen (Fre2)             |                |          |          | .81      |          |          | .54   |  |  |  |  |  |
| 17                            | Mit Freunden gespielt (Fre1)                  |                |          |          | .63      |          |          | .51   |  |  |  |  |  |
| 20                            | Anders gefühlt (Fre4) <sup>a</sup>            |                |          |          | .32      |          |          | .27   |  |  |  |  |  |
| 2                             | Kopf / Bauchschmerzen (Kör2) <sup>a,b</sup>   | .66            |          |          |          |          | .31      | .48   |  |  |  |  |  |
| 1                             | krank gefühlt (Kör1) <sup>a,b</sup>           | .65            |          |          |          |          |          | .35   |  |  |  |  |  |
| 8                             | ängstlich / unsicher (Psy4) <sup>a,b</sup>    | .53            |          |          |          |          |          | .45   |  |  |  |  |  |
| 3                             | müde / schlapp (Kör3) <sup>a,b</sup>          | .52            |          |          |          |          |          | .42   |  |  |  |  |  |
| 7                             | allein gefühlt (Psy3) <sup>a,b</sup>          | .41            |          |          |          |          |          | .56   |  |  |  |  |  |
| 5                             | Freude / viel gelacht (Psy1)                  |                |          |          |          |          |          | .46   |  |  |  |  |  |
| 13                            | Mit Eltern verstanden (Fam1)                  |                |          | .70      |          |          |          | .50   |  |  |  |  |  |
| 14                            | zu Hause wohlgefühlt (Fam2)                   |                |          | .54      |          |          |          | .35   |  |  |  |  |  |
| 15                            | Streit mit Eltern (Fam3) <sup>a</sup>         |                |          | .51      |          |          |          | .28   |  |  |  |  |  |
| 16                            | Bevormundung durch Eltern (Fam4) <sup>a</sup> |                |          | .42      |          |          | -.32     | .38   |  |  |  |  |  |
| 24                            | Angst um Noten (Sch4) <sup>a,b</sup>          |                |          |          |          | .77      |          | .56   |  |  |  |  |  |
| 23                            | Sorge um Zukunft (Sch3) <sup>a,b</sup>        |                |          |          |          | .68      |          | .54   |  |  |  |  |  |
| 6                             | Keine Lust (Psy2) <sup>a,b</sup>              |                |          |          |          |          | .51      | .31   |  |  |  |  |  |
| 22                            | Spaß am Unterricht (Sch2)                     |                |          |          |          |          | .40      | .35   |  |  |  |  |  |
| 21                            | Schule gut geschafft (Sch1)                   |                |          |          |          |          | .31      | .30   |  |  |  |  |  |
| Eigenwert                     |                                               | 5.77           | 2.09     | 1.89     | 1.60     | 1.31     | 1.24     |       |  |  |  |  |  |
| Varianzaufklärung (unrotiert) |                                               | 22 %           | 7 %      | 6 %      | 4 %      | 3 %      | 3 %      |       |  |  |  |  |  |
| Varianzaufklärung (rotiert)   |                                               | 9 %            | 10 %     | 6 %      | 9 %      | 5 %      | 6 %      |       |  |  |  |  |  |
| Faktorinterkorrelationen      |                                               |                |          |          |          |          |          |       |  |  |  |  |  |
| Faktor 1                      |                                               | -              |          |          |          |          |          |       |  |  |  |  |  |
| Faktor 2                      |                                               | .40            | -        |          |          |          |          |       |  |  |  |  |  |
| Faktor 3                      |                                               | .28            | .17      | -        |          |          |          |       |  |  |  |  |  |
| Faktor 4                      |                                               | .46            | .57      | .24      | -        |          |          |       |  |  |  |  |  |
| Faktor 5                      |                                               | .32            | .22      | .12      | .41      | -        |          |       |  |  |  |  |  |
| Faktor 6                      |                                               | .13            | .40      | .07      | .43      | .25      | -        |       |  |  |  |  |  |

*Anmerkungen:* <sup>a</sup> Invers formuliertes Item, das vor der Analyse entsprechend umgepolt wurde. <sup>b</sup> Item zeigt aus psychopathologischer Sicht inhaltliche Assoziation mit psychischer Symptomatik.

Elektronisches Supplement 4. Varianzaufklärung, Faktorladungen und Faktorinterkorrelationen der durchgeführten Promax-rotierten Hauptachsenanalysen

Tabelle E2. Faktorielle Struktur der Kid-KINDL Fremdeinschätzung nach Durchführung einer Hauptachsenanalyse ( $N = 154$ , dargestellt wurden alle Faktorladungen  $\geq .30$  der Promax-rotierten Sechsfaktoren-Lösung mit MinRes Schätzverfahren)

|                               | Item                                          | Faktorladungen |          |          |          |          |          | $h^2$ |
|-------------------------------|-----------------------------------------------|----------------|----------|----------|----------|----------|----------|-------|
|                               |                                               | Faktor 1       | Faktor 2 | Faktor 3 | Faktor 4 | Faktor 5 | Faktor 6 |       |
| 11                            | Selbst mögen (Sel3)                           | .70            |          |          |          |          |          | .55   |
| 5                             | Freude / viel gelacht (Psy1)                  | .66            |          |          |          |          |          | .61   |
| 12                            | gute Ideen gehabt (Sel4)                      | .64            |          |          |          |          |          | .54   |
| 14                            | zu Hause wohlgefühlt (Fam2)                   | .60            |          |          |          |          |          | .50   |
| 10                            | Wohlbefinden (Sel2)                           | .54            |          |          |          |          |          | .52   |
| 9                             | stolz fühlen (Sel1)                           | .48            |          |          |          |          |          | .46   |
| 16                            | Bevormundung durch Eltern (Fam4) <sup>a</sup> | .44            |          | .37      |          |          |          | .54   |
| 4                             | Kraft / Ausdauer (Kör4) <sup>b</sup>          | .42            |          | -.35     |          |          |          | .47   |
| 6                             | Keine Lust (Psy2) <sup>a,b</sup>              | .37            |          |          |          |          |          | .62   |
| 19                            | Mit Freunden verstanden (Fre3)                |                | .84      |          |          |          |          | .51   |
| 17                            | Mit Freunden gespielt (Fre1)                  |                | .83      |          |          |          |          | .33   |
| 18                            | Bei Anderen gut angekommen (Fre2)             |                | .75      |          |          |          |          | .33   |
| 2                             | Kopf / Bauchschmerzen (Kör2) <sup>a,b</sup>   |                |          |          | .97      |          |          | .37   |
| 1                             | krank gefühlt (Kör1) <sup>a,b</sup>           |                |          |          | .75      |          |          | .48   |
| 3                             | müde / schlapp (Kör3) <sup>a,b</sup>          |                |          |          | .36      |          |          | .26   |
| 24                            | Angst um Noten (Sch4) <sup>a,b</sup>          |                |          |          |          | .72      |          | .33   |
| 8                             | ängstlich / unsicher (Psy4) <sup>a,b</sup>    |                |          |          |          | .59      |          | .68   |
| 20                            | Anders gefühlt (Fre4) <sup>a</sup>            |                |          |          |          | .51      |          | .65   |
| 23                            | Sorge um Zukunft (Sch3) <sup>a,b</sup>        |                |          |          |          | .47      |          | .66   |
| 7                             | allein gefühlt (Psy3) <sup>a,b</sup>          |                |          |          |          | .39      |          | .42   |
| 15                            | Streit mit Eltern (Fam3) <sup>a</sup>         |                |          | .87      |          |          |          | .73   |
| 13                            | Mit Eltern verstanden (Fam1) <sup>a</sup>     |                |          | .74      |          |          |          | .67   |
| 21                            | Schule gut geschafft (Sch1)                   |                |          |          |          |          | .75      | .71   |
| 22                            | Spaß am Unterricht (Sch2)                     |                |          |          |          |          | .64      | .33   |
| Eigenwert                     |                                               | 6.87           | 2.31     | 1.97     | 1.41     | 1.32     | 1.16     |       |
| Varianzaufklärung (unrotiert) |                                               | 27 %           | 8 %      | 7 %      | 4 %      | 3 %      | 3 %      |       |
| Varianzaufklärung (rotiert)   |                                               | 13 %           | 10 %     | 7 %      | 7 %      | 8 %      | 5 %      |       |
| Faktorinterkorrelationen      |                                               |                |          |          |          |          |          |       |
| Faktor 1                      |                                               | -              |          |          |          |          |          |       |
| Faktor 2                      |                                               | .38            | -        |          |          |          |          |       |
| Faktor 3                      |                                               | .23            | -.05     | -        |          |          |          |       |
| Faktor 4                      |                                               | .56            | .20      | .06      | -        |          |          |       |
| Faktor 5                      |                                               | .60            | .41      | .11      | .53      | -        |          |       |
| Faktor 6                      |                                               | .44            | .26      | -.06     | .39      | .40      | -        |       |

Anmerkungen: <sup>a</sup> Invers formuliertes Item, das vor der Analyse entsprechend umgepolt wurde. <sup>b</sup> Item zeigt aus psychopathologischer Sicht inhaltliche Assoziation mit psychosomatischen Symptomen.

Tabelle E3. Gemeinsame Faktorenstruktur der Kid-KINDL Selbst- und Fremdeinschätzung nach Durchführung einer Hauptachsenanalyse ( $N = 301$ , dargestellt wurden alle Faktorladungen  $\geq .30$  der Promax-rotierten Sechs-Faktoren-Lösung mit MinRes Schätzverfahren)

|                               | Item                                          | Faktorladungen |          |          |          |          |          | $h^2$ |
|-------------------------------|-----------------------------------------------|----------------|----------|----------|----------|----------|----------|-------|
|                               |                                               | Faktor 1       | Faktor 2 | Faktor 3 | Faktor 4 | Faktor 5 | Faktor 6 |       |
| 10                            | Wohlbefinden (Sel2)                           | .80            |          |          |          |          |          | .75   |
| 12                            | gute Ideen gehabt (Sel4)                      | .80            |          |          |          |          |          | .39   |
| 9                             | stolz fühlen (Sel1)                           | .74            |          |          |          |          |          | .51   |
| 11                            | Selbst mögen (Sel3)                           | .57            |          |          |          |          |          | .42   |
| 5                             | Freude / viel gelacht (Psy1)                  | .49            |          |          |          |          |          | .45   |
| 6                             | Keine Lust (Psy2) <sup>a,b</sup>              | .40            |          |          |          |          |          | .30   |
| 4                             | Kraft / Ausdauer (Kör4) <sup>b</sup>          | .36            |          |          |          |          |          | .32   |
| 19                            | Mit Freunden verstanden (Fre3)                |                |          | .90      |          |          |          | .67   |
| 18                            | Bei anderen gut angekommen (Fre2)             |                |          | .78      |          |          |          | .61   |
| 17                            | Mit Freunden gespielt (Fre1)                  |                |          | .75      |          |          |          | .51   |
| 1                             | krank gefühlt (Kör1) <sup>a,b</sup>           |                |          |          | .82      |          |          | .45   |
| 2                             | Kopf / Bauchschmerzen (Kör2) <sup>a,b</sup>   |                |          |          | .79      |          |          | .50   |
| 3                             | müde / schlapp (Kör3) <sup>a,b</sup>          |                |          |          | .51      |          |          | .43   |
| 7                             | allein gefühlt (Psy3) <sup>a,b,c</sup>        |                |          |          |          |          |          | .48   |
| 13                            | Mit Eltern verstanden (Fam1)                  |                | .76      |          |          |          |          | .61   |
| 15                            | Streit mit Eltern (Fam3) <sup>a</sup>         |                | .66      |          |          |          |          | .42   |
| 14                            | zu Hause wohlgeföhlt (Fam2)                   |                | .53      |          |          |          |          | .34   |
| 16                            | Bevormundung durch Eltern (Fam4) <sup>a</sup> |                | .45      |          |          |          |          | .27   |
| 24                            | Angst um Noten (Sch4) <sup>a,b</sup>          |                |          |          |          | .82      |          | .47   |
| 23                            | Sorge um Zukunft (Sch3) <sup>a,b</sup>        |                |          |          |          | .62      |          | .38   |
| 20                            | Anders geföhlt (Fre4) <sup>a</sup>            |                |          |          |          | .39      |          | .29   |
| 8                             | ängstlich / unsicher (Psy4) <sup>a,b</sup>    |                |          |          |          | .37      |          | .42   |
| 22                            | Spaß am Unterricht (Sch2)                     |                |          |          |          |          | .64      | .53   |
| 21                            | Schule gut geschafft (Sch1)                   |                |          |          |          |          | .58      | .43   |
| Varianzaufklärung (unrotiert) |                                               | 24 %           | 6 %      | 5 %      | 4 %      | 3 %      | 2 %      |       |
| Varianzaufklärung (rotiert)   |                                               | 11 %           | 7 %      | 9 %      | 8 %      | 6 %      | 4 %      |       |
| Faktorinterkorrelationen      |                                               |                |          |          |          |          |          |       |
|                               | Faktor 1                                      | -              |          |          |          |          |          |       |
|                               | Faktor 2                                      | .28            | -        |          |          |          |          |       |
|                               | Faktor 3                                      | .56            | .22      | -        |          |          |          |       |
|                               | Faktor 4                                      | .61            | .30      | .40      | -        |          |          |       |
|                               | Faktor 5                                      | .49            | .24      | .48      | .57      | -        |          |       |
|                               | Faktor 6                                      | .48            | .14      | .39      | .35      | .28      | -        |       |

Anmerkungen: <sup>a</sup> Invers formuliertes Item, das vor der Analyse entsprechend umgepolt wurde. <sup>b</sup> Item zeigt aus psychopathologischer Sicht heraus inhaltliche Assoziation mit psychischer Symptomatik. <sup>c</sup> Das Item „allein geföhlt“ (Psy3) lud auf keinem Faktor in ausreichender Höhe, wurde in den CFAs aber aufgrund seiner inhaltlichen Bedeutung der Skala *Ängste* (Faktor 5 der durchgeführten EFA) zugeordnet.
